# Supplementary material for: Reducing the Glycemic Index or Carbohydrate Content of Mixed Meals Reduces Postprandial Glycemia and Insulinemia Over the Entire Day but Does Not Affect Satiety
Source: PubMed Central journal article supplement — Diabetes Care. 2012 Jul 14;35(8):1633–7. doi: 10.2337/dc12-0329 (PMC3402243; doi:10.2337/dc12-0329), 2012-07-14

SUPPLEMENTARY DATA

Supplementary Table 1. High glycemic index, high carbohydrate menu

| High GI High Carb Targets for each meal based on 2200 Calories: Kcals-733, CHO-102.6, Pro-36.6, Fat-19.5 (56/20/24) |                                     |             |            |            |         |            |           |               |              |              |               |             |                |              |  |
|---------------------------------------------------------------------------------------------------------------------|-------------------------------------|-------------|------------|------------|---------|------------|-----------|---------------|--------------|--------------|---------------|-------------|----------------|--------------|--|
| Gram Wt                                                                                                             | Peach Yogurt with Trail Mix         | Food Number | GI Glucose | GI Bread   | Ref Svc | Avail CHO  | GL        | Kcals         | Protein      | Fat          | CHO           | Fiber       | GI Bread       | GL Bread     |  |
| 13.00                                                                                                               | Cheerios                            | 163         | 74         | 106        | 30      | 20         | 15        | 47.45         | 1.36         | 0.77         | 9.91          | 1.14        | 1050.46        |              |  |
| 110.00                                                                                                              | yogurt, lowfat, aspartame           | 381         | 23         | 33         | 200     | 16         | 4         | 47.30         | 4.25         | 0.20         | 8.25          | 0.00        | 272.25         |              |  |
| 28.00                                                                                                               | dates                               | 404         | 103        | 147        | 60      | 44         | 28        | 78.96         | 0.69         | 0.11         | 21.01         | 2.24        | 3088.47        |              |  |
| 25.00                                                                                                               | walnuts                             | None        | NV         | NV         | NV      | NV         | NV        | 151.75        | 6.09         | 14.15        | 3.03          | 1.25        | 0              |              |  |
| 84.00                                                                                                               | cream cheese, fat free              | None        | NV         | NV         | NV      | NV         | NV        | 80.64         | 12.10        | 1.14         | 4.87          | 0.00        | 0              |              |  |
| 40.50                                                                                                               | White bread, Wonder                 | 103         | 71         | 101        | 30      | 14         | 10        | 108.13        | 3.32         | 1.46         | 20.05         | 0.93        | 2025.05        |              |  |
| 35.00                                                                                                               | Cornflakes                          | 168         | 92         | 130        | 30      | 26         | 21        | 127.75        | 2.30         | 0.25         | 30.27         | 0.88        | 3935.1         |              |  |
| 60.00                                                                                                               | egg white                           | None        | NV         | NV         | NV      | NV         | NV        | 30.00         | 6.31         | 0.00         | 0.62          | 0.00        | 0              |              |  |
| 2.00                                                                                                                | Butter                              | None        | NV         | NV         | NV      | NV         | NV        | 14.34         | 0.02         | 1.62         | 0.00          | 0.00        | 0              |              |  |
| 6.00                                                                                                                | Honey                               | 586         | 55         | 78         | 25      | 18         | 10        | 18.24         | 0.02         | 0.00         | 4.94          | 0.01        | 385.32         |              |  |
| 0.80                                                                                                                | Cellulose                           | None        | NV         | NV         | NV      | NV         | NV        | 0.00          | 0.00         | 0.00         | 0.00          | 0.80        | 0              |              |  |
| <b>Meal Totals</b>                                                                                                  |                                     |             | <b>363</b> | <b>517</b> |         | <b>120</b> | <b>78</b> | <b>704.56</b> | <b>36.46</b> | <b>19.7</b>  | <b>102.95</b> | <b>7.25</b> | <b>104.484</b> | <b>107.6</b> |  |
| Gram Wt                                                                                                             | Cheesy Bread                        | Food Number | GI Glucose | GI Bread   | Ref Svc | Avail CHO  | GL        | Kcals         | Protein      | Fat          | CHO           | Fiber       | GI             | GL           |  |
| 50.00                                                                                                               | Milk, skim                          | 373         | 32         | 46         | 250     | 13         | 4         | 18.43         | 1.78         | 0.13         | 2.51          | 0.00        | 0              |              |  |
| 51.30                                                                                                               | Flour, self rising (Bisquick)       | 101         | 70         | 100        | 30      | 14         | 10        | 205.2         | 3.85         | 7.69         | 32.06         | 0.00        | 3206           |              |  |
| 40.00                                                                                                               | Cheese, cheddar (RF)                | None        | NV         | NV         | NV      | NV         | NV        | 128.57        | 10.00        | 8.57         | 1.43          | 0.00        | 0              |              |  |
| 49.60                                                                                                               | Cornflakes, Kellogg's, USA          | 168         | 92         | 130        | 30      | 26         | 21        | 181.04        | 3.25         | 0.35         | 42.90         | 1.24        | 5577           |              |  |
| 38.50                                                                                                               | Bread, white, Wonder, ground        | 103         | 71         | 101        | 30      | 14         | 10        | 102.79        | 3.16         | 1.39         | 19.06         | 0.89        | 1925.06        |              |  |
| 2.00                                                                                                                | Butter, salted                      | None        | NV         | NV         | NV      | NV         | NV        | 14.34         | 0.02         | 1.62         | 0.00          | 0.00        | 0              |              |  |
| 50.00                                                                                                               | Water, Tap                          | None        | NV         | NV         | NV      | NV         | NV        | 0             | 0.00         | 0.00         | 0.00          | 0.00        | 0              |              |  |
| 5.50                                                                                                                | Cellulose, Food Grade               | None        | NV         | NV         | NV      | NV         | NV        | 0             | 0.00         | 0.00         | 0.00          | 5.50        | 0              |              |  |
| 100.00                                                                                                              | Egg white                           | None        | NV         | NV         | NV      | NV         | NV        | 50            | 10.52        | 0.00         | 1.03          | 0.00        | 0              |              |  |
| 50.00                                                                                                               | Yogurt, plain, nonfat               | 381         | 24         | 34         | 200     | 14         | 3         | 27.89         | 2.87         | 0.09         | 3.84          | 0.00        | 130.56         |              |  |
| <b>Meal Totals</b>                                                                                                  |                                     |             | <b>265</b> | <b>377</b> |         | <b>67</b>  | <b>45</b> | <b>728.26</b> | <b>35.45</b> | <b>19.84</b> | <b>102.83</b> | <b>7.63</b> | <b>104.134</b> | <b>107.1</b> |  |
| Gram Wt                                                                                                             | Potato Bake                         | Food Number | GI Glucose | GI Bread   | Ref Svc | Avail CHO  | GL        | Kcals         | Protein      | Fat          | CHO           | Fiber       | GI             | GL           |  |
| 214.00                                                                                                              | Potato, Russet, Baked, no skin, mea | 603         | 85         | 121        | 150     | 30         | 26        | 199.02        | 4.19         | 0.21         | 46.12         | 3.21        | 5580.52        |              |  |
| 40.00                                                                                                               | Cheese, cheddar                     | None        | NV         | NV         | NV      | NV         | NV        | 161.2         | 9.96         | 13.26        | 0.51          | 0           | 0              |              |  |
| 20.00                                                                                                               | Flour, All Purpose                  | 101         | 70         | 100        | 30      | 14         | 10        | 72.8          | 2.07         | 0.2          | 15.26         | 0.54        | 1526           |              |  |
| 60.00                                                                                                               | Milk, skim                          | 373         | 32         | 46         | 250     | 13         | 4         | 20.95         | 2.05         | 0.11         | 2.91          | 0           | 133.86         |              |  |
| 100.00                                                                                                              | Chicken Broth, Swanson              | None        | NV         | NV         | NV      | NV         | NV        | 16            | 2.02         | 0.57         | 0.38          | 0           | 0              |              |  |
| 65.00                                                                                                               | Ham, diced, smoked                  | None        | NV         | NV         | NV      | NV         | NV        | 69.64         | 10.45        | 2.32         | 1.16          | 0           | 0              |              |  |
| 71.00                                                                                                               | Bread, white, Wonder, ground        | 103         | 71         | 101        | 30      | 14         | 10        | 189.57        | 5.82         | 2.56         | 35.15         | 1.63        | 3550.15        |              |  |
| 20.00                                                                                                               | Onions, Frozen, chopped             | None        | NV         | NV         | NV      | NV         | NV        | 5.8           | 0.16         | 0.02         | 1.36          | 0.36        | 0              |              |  |
| 2.40                                                                                                                | Cellulose, Food Grade               | None        | NV         | NV         | NV      | NV         | NV        | 0             | 0            | 0            | 0             | 2.4         | 0              |              |  |
| <b>Meal Totals</b>                                                                                                  |                                     |             | <b>258</b> | <b>368</b> |         | <b>71</b>  | <b>50</b> | <b>734.98</b> | <b>36.72</b> | <b>19.25</b> | <b>102.85</b> | <b>8.14</b> | <b>104.915</b> | <b>107.9</b> |  |

SUPPLEMENTARY DATA

Supplementary Table 2. High glycemic index, low carbohydrate menu

| High GI Low Carb Targets for each meal based on 2200 Calories: Kcals-733, CHO73.3, Pro-36.6, Fat-32.6, (40/20/40) |                                |             |            |            |                  |            |           |               |              |              |              |             |                  |              |
|-------------------------------------------------------------------------------------------------------------------|--------------------------------|-------------|------------|------------|------------------|------------|-----------|---------------|--------------|--------------|--------------|-------------|------------------|--------------|
| Gram Wt                                                                                                           | Peach Yogurt with Trail Mix    | Food Number | GI Glucose | GI Bread   | Ref Svg Size(GM) | Avail CHO  | GL        | Kcals         | Protein      | Fat          | CHO          | Fiber       | GI               | GL           |
| 9.80                                                                                                              | Cheerios                       | 163         | 74         | 106        | 30               | 20         | 15        | 35.77         | 1.03         | 0.58         | 7.47         | 0.86        | 791.82           |              |
| 120.00                                                                                                            | yogurt, lowfat, aspartame      | 381         | 23         | 33         | 200              | 16         | 4         | 51.60         | 4.63         | 0.22         | 9.00         | 0.00        | 297              |              |
| 34.70                                                                                                             | dates, Sunsweet, California Ch | 404         | 103        | 147        | 60               | 44         | 28        | 97.85         | 0.85         | 0.14         | 26.04        | 2.78        | 3827.88          |              |
| 37.00                                                                                                             | walnuts                        | 558         | 22         | 31         | 50               | 13         | 3         | 228.66        | 8.90         | 21.83        | 3.67         | 2.52        | 113.77           |              |
| 81.00                                                                                                             | cream cheese, fat free         | None        | NV         | NV         | NV               | NV         | NV        | 77.76         | 11.67        | 1.10         | 4.70         | 0.00        | 0                |              |
| 18.20                                                                                                             | White Bread, Wonder            | 103         | 71         | 101        | 30               | 14         | 10        | 48.59         | 1.49         | 0.66         | 9.01         | 0.42        | 910.01           |              |
| 14.30                                                                                                             | Cornflakes, Kellogg's, USA     | 168         | 92         | 130        | 30               | 26         | 21        | 51.62         | 1.00         | 0.11         | 12.30        | 0.36        | 1599             |              |
| 60.00                                                                                                             | egg white                      | None        | NV         | NV         | NV               | NV         | NV        | 31.20         | 6.54         | 0.10         | 0.44         | 0.00        | 0                |              |
| 10.00                                                                                                             | Butter, salted, whipped        | None        | NV         | NV         | NV               | NV         | NV        | 71.68         | 0.09         | 8.11         | 0.01         | 0.00        | 0                |              |
| 1.80                                                                                                              | Honey                          | 586         | 55         | 78         | 25               | 18         | 10        | 5.47          | 0.01         | 0.00         | 1.48         | 0.00        | 115.44           |              |
| 0.60                                                                                                              | Cellulose, Food Grade          | None        | NV         | NV         | NV               | NV         | NV        | 0.00          | 0.00         | 0.00         | 0.00         | 0.60        | 0                |              |
| <b>Meal Totals</b>                                                                                                |                                |             | <b>385</b> | <b>548</b> |                  | <b>133</b> | <b>81</b> | <b>700.2</b>  | <b>36.21</b> | <b>32.85</b> | <b>74.12</b> | <b>7.54</b> | <b>103.27739</b> | <b>76.55</b> |
| Gram Wt                                                                                                           | Cheesy Bread                   | Food Number | GI Glucose | GI Bread   | Ref Svg Size(GM) | Avail CHO  | GL        | Kcals         | Protein      | Fat          | CHO          | Fiber       | GI               | GL           |
| 50.00                                                                                                             | Milk, skim                     | 373         | 32         | 46         | 250              | 13         | 4         | 18.43         | 1.78         | 0.13         | 2.51         | 0.00        | 0                |              |
| 45.00                                                                                                             | Flour, self rising (Bisquick)  | 101         | 70         | 100        | 30               | 14         | 10        | 180           | 3.38         | 6.75         | 28.13        | 0.54        | 2813             |              |
| 85.00                                                                                                             | Cheese, cheddar (RF)           | None        | NV         | NV         | NV               | NV         | NV        | 273.21        | 21.25        | 18.21        | 3.04         | 0.00        | 0                |              |
| 32.30                                                                                                             | Cornflakes, Kellogg's, USA     | 168         | 92         | 130        | 30               | 26         | 21        | 117.89        | 2.12         | 0.23         | 27.94        | 0.81        | 3632.2           |              |
| 24.40                                                                                                             | Bread, white, Wonder, ground   | 103         | 71         | 101        | 30               | 14         | 10        | 65.15         | 2.00         | 0.88         | 12.08        | 0.56        | 1220.08          |              |
| 8.00                                                                                                              | Butter, salted                 | Nove        | NV         | NV         | NV               | NV         | NV        | 57.36         | 0.07         | 6.49         | 0.00         | 0.00        | 0                |              |
| 50.00                                                                                                             | Water, Tap                     | Nove        | NV         | NV         | NV               | NV         | NV        | 0             | 0.00         | 0.00         | 0.00         | 0.00        | 0                |              |
| 55.00                                                                                                             | Egg White, Raw                 | Nove        | NV         | NV         | NV               | NV         | NV        | 27.5          | 5.79         | 0.00         | 0.57         | 0.00        | 0                |              |
| 5.70                                                                                                              | Cellulose, Food Grade          | None        | NV         | NV         | NV               | NV         | NV        | 0             | 0.00         | 0.00         | 0.00         | 5.70        | 0                |              |
| <b>Meal Totals</b>                                                                                                |                                |             | <b>265</b> | <b>377</b> |                  | <b>67</b>  | <b>45</b> | <b>739.54</b> | <b>36.39</b> | <b>32.69</b> | <b>74.27</b> | <b>7.61</b> | <b>103.20829</b> | <b>76.65</b> |
| Gram Wt                                                                                                           | Potato Bake                    | Food Number | GI Glucose | GI Bread   | Ref Svg Size(GM) | Avail CHO  | GL        | Kcals         | Protein      | Fat          | CHO          | Fiber       | GI               | GL           |
| 185.00                                                                                                            | Potato, Russet, Baked, no skin | 603         | 85         | 121        | 150              | 30         | 26        | 172.05        | 3.63         | 0.19         | 39.87        | 2.77        | 4824.27          |              |
| 55.00                                                                                                             | Cheese, cheddar                | None        | NV         | NV         | NV               | NV         | NV        | 221.65        | 13.69        | 18.23        | 0.70         | 0.00        | 0                |              |
| 20.00                                                                                                             | Flour, All Purpose             | 101         | 70         | 100        | 30               | 14         | 10        | 72.80         | 2.07         | 0.20         | 15.26        | 0.54        | 1526             |              |
| 60.00                                                                                                             | Milk, skim                     | 373         | 32         | 46         | 250              | 13         | 4         | 20.95         | 2.05         | 0.11         | 2.91         | 0.00        | 133.86           |              |
| 100.00                                                                                                            | Chicken Broth, Swanson         | None        | NV         | NV         | NV               | NV         | NV        | 16.00         | 2.02         | 0.57         | 0.38         | 0.00        | 0                |              |
| 69.00                                                                                                             | Ham, diced, smoked             | None        | NV         | NV         | NV               | NV         | NV        | 73.93         | 11.09        | 2.46         | 1.23         | 0.00        | 0                |              |
| 24.00                                                                                                             | Bread, white, Wonder, ground   | 103         | 71         | 101        | 30               | 14         | 10        | 64.08         | 1.97         | 0.86         | 11.88        | 0.55        | 1199.88          |              |
| 10.00                                                                                                             | Oil, Olive                     | None        | NV         | NV         | NV               | NV         | NV        | 88.40         | 0.00         | 10.00        | 0.00         | 0.00        | 0                |              |
| 20.00                                                                                                             | Onions, Frozen, chopped        | None        | NV         | NV         | NV               | NV         | NV        | 5.80          | 0.16         | 0.02         | 1.36         | 0.36        | 0                |              |
| 3.00                                                                                                              | Cellulose, Food Grade          | None        | NV         | NV         | NV               | NV         | NV        | 0.00          | 0.00         | 0.00         | 0.00         | 3.00        | 0                |              |
| <b>Meal Totals</b>                                                                                                |                                |             | <b>258</b> | <b>368</b> |                  | <b>71</b>  | <b>50</b> | <b>735.66</b> | <b>36.68</b> | <b>32.64</b> | <b>73.59</b> | <b>7.22</b> | <b>104.4165</b>  | <b>76.84</b> |

SUPPLEMENTARY DATA

Supplementary Table 3. Low glycemic index, high carbohydrate menu

| Low GI High Carb Targets for each meal based on 2200 Calories: Kcals-733, CHO-102.6, Pro-36.6, Fat-19.5 (56/20/24) |                               |             |            |            |         |           |           |               |              |              |               |             |               | GI            | GL            | GI            | GL |
|--------------------------------------------------------------------------------------------------------------------|-------------------------------|-------------|------------|------------|---------|-----------|-----------|---------------|--------------|--------------|---------------|-------------|---------------|---------------|---------------|---------------|----|
| Gram Wt                                                                                                            | Peach Yogurt with Trail Mi    | Food Number | GI Glucose | GI Bread   | Ref Svr | Avail CHO | GL        | Kcals         | Protein      | Fat          | CHO           | Fiber       | GI Glucos     | GL Gluco      | GI Bread      | GL Bread      |    |
| 31.20                                                                                                              | Cheerios                      | 163         | 74         | 106        | 30      | 20        | 15        | 115.13        | 3.43         | 1.87         | 23.09         | 2.81        | 1708.7        |               | 2447.5        |               |    |
| 170.00                                                                                                             | yogurt, lowfat, aspartame     | 381         | 23         | 33         | 200     | 16        | 4         | 73.10         | 6.56         | 0.31         | 12.75         | 0.00        | 293.25        |               | 420.75        |               |    |
| 54.00                                                                                                              | peaches, canned, juice packe  | 419         | 38         | 54         | 120     | 11        | 4         | 23.76         | 0.34         | 0.02         | 6.25          | 0.70        | 237.5         |               | 337.5         |               |    |
| 32.00                                                                                                              | cashews                       | 558         | 22         | 31         | 50      | 13        | 3         | 183.68        | 4.90         | 14.83        | 10.46         | 0.96        | 230.12        |               | 324.26        |               |    |
| 87.00                                                                                                              | cream cheese, fat free        | None        | NV         | NV         | NV      | NV        | NV        | 83.52         | 12.54        | 1.18         | 5.05          | 0.00        | 0             |               | 0             |               |    |
| 20.00                                                                                                              | pumpnickel bread              | 84          | 50         | 71         | 30      | 12        | 6         | 55.00         | 1.90         | 0.68         | 10.44         | 1.42        | 522           |               | 741.24        |               |    |
| 25.00                                                                                                              | Golden Grahams                | 180         | 71         | 102        | 30      | 25        | 18        | 96.25         | 1.33         | 0.90         | 21.41         | 0.77        | 1520.1        |               | 2183.8        |               |    |
| 50.00                                                                                                              | egg white                     | None        | NV         | NV         | NV      | NV        | NV        | 25.00         | 5.26         | 0.00         | 0.51          | 0.00        | 0             |               | 0             |               |    |
| 13.00                                                                                                              | Fructose                      | 580         | 19.2       | 27         | 10      | 10        | 2         | 48.46         | 0.00         | 0.00         | 12.92         | 0.00        | 248.06        |               | 348.84        |               |    |
| 1.00                                                                                                               | Cellulose, Food Grade         | None        | NV         | NV         | NV      | NV        | NV        | 0.00          | 0.00         | 0.00         | 0.00          | 1.00        | 0             |               | 0             |               |    |
| <b>Meal Totals</b>                                                                                                 |                               |             | <b>278</b> | <b>397</b> |         | <b>97</b> | <b>50</b> | <b>703.9</b>  | <b>36.26</b> | <b>19.79</b> | <b>102.88</b> | <b>7.66</b> | <b>46.265</b> | <b>47.597</b> | <b>66.135</b> | <b>68.04</b>  |    |
| Gram Wt                                                                                                            | Cheesy Bread                  | Food Number | GI Glucose | GI Bread   | Ref Svr | Avail CHO | GL        | Kcals         | Protein      | Fat          | CHO           | Fiber       | GI Glucos     | GL Gluco      | GI            | GL            |    |
| 50.00                                                                                                              | Milk, skim                    | 373         | 32         | 46         | 250     | 12        | 3         | 18.50         | 1.78         | 0.13         | 2.51          | 0.00        | 80.32         |               | 115.46        |               |    |
| 61.00                                                                                                              | Flour, self rising (Bisquick) | 101         | 70         | 100        | 20      | 14        | 10        | 244.00        | 4.57         | 9.15         | 38.13         | 0.00        | 2669.1        |               | 3813          |               |    |
| 53.00                                                                                                              | Bread, Pumpnickel, mean 6     | 84          | 50         | 71         | 30      | 12        | 6         | 132.50        | 4.61         | 1.77         | 25.17         | 3.44        | 1258.5        |               | 1787.1        |               |    |
| 40.00                                                                                                              | Cheese, cheddar (RF)          | None        | NV         | NV         | NV      | NV        | NV        | 128.57        | 10.00        | 8.57         | 1.43          | 0.00        | 0             |               | 0             |               |    |
| 26.00                                                                                                              | Barley, pearled, raw          | 256         | 25         | 36         | 150     | 42        | 11        | 91.52         | 2.58         | 0.30         | 20.21         | 4.06        | 505.25        |               | 727.56        |               |    |
| 70.00                                                                                                              | Yogurt, plain, nonfat         | 381         | 24         | 34         | 200     | 14        | 3         | 39.04         | 4.01         | 0.13         | 5.38          | 0.00        | 129.12        |               | 182.92        |               |    |
| 50.00                                                                                                              | Water, Tap                    | None        | NV         | NV         | NV      | NV        | NV        | 0.00          | 0.00         | 0.00         | 0.00          | 0.00        | 0             |               | 0             |               |    |
| 9.00                                                                                                               | Fructose                      | 580         | 19.2       | 27         | 10      | 10        | 2         | 32.31         | 0.00         | 0.00         | 8.62          | 0.06        | 165.5         |               | 232.74        |               |    |
| 85.00                                                                                                              | Egg white                     | Nove        | NV         | NV         | NV      | NV        | NV        | 42.50         | 8.94         | 0.00         | 0.88          | 0.00        | 0             |               | 0             |               |    |
| <b>Meal Totals</b>                                                                                                 |                               |             | <b>201</b> | <b>287</b> |         | <b>94</b> | <b>33</b> | <b>728.94</b> | <b>36.49</b> | <b>20.05</b> | <b>102.33</b> | <b>7.56</b> | <b>46.983</b> | <b>48.078</b> | <b>67.026</b> | <b>68.588</b> |    |
| Gram Wt                                                                                                            | Sweet Potato Bake             | Food Number | GI Glucose | GI Bread   | Ref Svr | Avail CHO | GL        | Kcals         | Protein      | Fat          | CHO           | Fiber       | GI Glucos     | GL Gluco      | GI            | GL            |    |
| 60.00                                                                                                              | Cheese, mozzarella, part skim | None        | NV         | NV         | NV      | NV        | NV        | 152.50        | 14.56        | 9.55         | 1.66          | 0.00        | 0             |               | 0             |               |    |
| 80.00                                                                                                              | Chicken Broth, Home Taste     | None        | NV         | NV         | NV      | NV        | NV        | 12.80         | 1.62         | 0.46         | 0.30          | 0.00        | 0             |               | 0             |               |    |
| 31.00                                                                                                              | Flour, All Purpose            | 101         | 70         | 100        | 20      | 14        | 10        | 112.84        | 3.20         | 0.30         | 23.66         | 0.84        | 1656.2        |               | 2366          |               |    |
| 60.00                                                                                                              | Milk, skim                    | 373         | 32         | 46         | 250     | 12        | 3         | 20.95         | 2.05         | 0.11         | 2.91          | 0.00        | 93.12         |               | 133.86        |               |    |
| 127.00                                                                                                             | Sweet Potato, cooked          | 613         | 44         | 63         | 150     | 25        | 11        | 147.32        | 1.89         | 0.18         | 35.05         | 4.95        | 1542.2        |               | 2208.2        |               |    |
| 60.00                                                                                                              | Ham, diced, smoked            | None        | NV         | NV         | NV      | NV        | NV        | 64.29         | 9.64         | 2.14         | 1.07          | 0.00        | 0             |               | 0             |               |    |
| 40.00                                                                                                              | Bread, Pumpnickel, mean 6     | 84          | 50         | 71         | 30      | 12        | 6         | 100.00        | 3.48         | 1.24         | 19.00         | 2.60        | 950           |               | 1349          |               |    |
| 10.00                                                                                                              | Onion, frozen                 | None        | NV         | 0          | NV      | NV        | NV        | 2.90          | 0.08         | 0.01         | 0.68          | 0.18        | 0             |               | 0             |               |    |
| 80.00                                                                                                              | Orange Juice                  | 431         | 46         | 74         | 250     | 34        | 15        | 35.20         | 0.64         | 0.22         | 8.05          | 0.16        | 370.3         |               | 595.7         |               |    |
| 10.00                                                                                                              | Fructose                      | 580         | 19.2       | 27         | 10      | 10        | 2         | 39.23         | 0.00         | 0.00         | 10.46         | 0.00        | 200.83        |               | 282.42        |               |    |
| 5.00                                                                                                               | Olive Oil                     | None        | NV         | NV         | NV      | NV        | NV        | 44.20         | 0.00         | 5.00         | 0.00          | 0.00        | 0             |               | 0             |               |    |
| <b>Meal Totals</b>                                                                                                 |                               |             | <b>196</b> | <b>381</b> |         | <b>63</b> | <b>30</b> | <b>732.23</b> | <b>37.16</b> | <b>19.21</b> | <b>102.84</b> | <b>8.73</b> | <b>46.797</b> | <b>48.127</b> | <b>67.436</b> | <b>69.351</b> |    |

SUPPLEMENTARY DATA

Supplementary Table 4. Low glycemic index, low carbohydrate menu

| Low GI Low Carb Targets for each meal based on 2200 Calories: Kcals-733, CHO73.3, Pro-36.6, Fat-32.6, (40/20/40) |                               |             |            |            |         |           |           |               |              |              |              |             |               |               |                 |              |  |
|------------------------------------------------------------------------------------------------------------------|-------------------------------|-------------|------------|------------|---------|-----------|-----------|---------------|--------------|--------------|--------------|-------------|---------------|---------------|-----------------|--------------|--|
| Gram Wt                                                                                                          | Peach Yogurt with Trail Mix   | Food Number | GI Glucose | GI Bread   | Ref Svc | Avail CHO | GL        | Kcals         | Protein      | Fat          | CHO          | Fiber       | GI Glucose    | GL Glucose    | GI              | GL           |  |
| 17.00                                                                                                            | Cheerios                      | 163         | 74         | 106        | 30      | 20        | 15        | 62.05         | 1.68         | 1.00         | 12.95        | 1.50        | 958.3         |               | 1372.7          |              |  |
| 150.00                                                                                                           | yogurt, lowfat, aspartame     | 381         | 23         | 33         | 200     | 16        | 4         | 64.50         | 5.17         | 0.27         | 11.25        | 0.00        | 258.75        |               | 371.25          |              |  |
| 32.00                                                                                                            | peaches, canned, juice packed | 419         | 38         | 54         | 120     | 11        | 4         | 7.68          | 0.29         | 0.02         | 1.96         | 0.42        | 74.48         |               | 105.84          |              |  |
| 42.00                                                                                                            | cashews                       | 558         | 22         | 31         | 50      | 13        | 3         | 244.02        | 4.90         | 20.06        | 12.67        | 1.39        | 278.74        |               | 392.77          |              |  |
| 65.00                                                                                                            | cream cheese, fat free        | None        | NV         | NV         | NV      | NV        | NV        | 62.40         | 12.10        | 0.88         | 3.77         | 0.00        | 0             |               | 0               |              |  |
| 29.50                                                                                                            | pumpnickel bread              | 84          | 50         | 71         | 30      | 12        | 6         | 73.75         | 2.57         | 0.91         | 14.01        | 1.92        | 700.5         |               | 994.71          |              |  |
| 20.00                                                                                                            | Golden Grahams                | 180         | 71         | 102        | 30      | 25        | 18        | 77.00         | 1.06         | 0.72         | 17.13        | 0.62        | 1216.2        |               | 1747.26         |              |  |
| 80.00                                                                                                            | egg white                     | None        | NV         | NV         | NV      | NV        | NV        | 40.00         | 8.42         | 0.00         | 0.82         | 0.00        | 0             |               | 0               |              |  |
| 11.00                                                                                                            | Butter, salted, whipped       | None        | NV         | NV         | NV      | NV        | NV        | 78.85         | 0.14         | 8.92         | 0.01         | 0.00        | 0             |               | 0               |              |  |
| 1.40                                                                                                             | Cellulose, Food Grade         | None        | NV         | NV         | NV      | NV        | NV        | 0.00          | 0.00         | 0.00         | 0.00         | 1.30        | 0             |               | 0               |              |  |
| <b>Meal Totals</b>                                                                                               |                               |             | <b>278</b> | <b>397</b> |         | <b>97</b> | <b>50</b> | <b>710.25</b> | <b>36.33</b> | <b>32.78</b> | <b>74.57</b> | <b>7.15</b> | <b>46.761</b> | <b>34.87</b>  | <b>66.84364</b> | <b>49.85</b> |  |
| Gram Wt                                                                                                          | Cheesy Bread                  | Food Number | GI Glucose | GI Bread   | Ref Svc | Avail CHO | GL        | Kcals         | Protein      | Fat          | CHO          | Fiber       | GI Glucose    | GL Glucose    | GI              | GL           |  |
| 50.00                                                                                                            | Milk, skim                    | 373         | 32         | 46         | 250     | 13        | 4         | 18.43         | 1.78         | 0.13         | 2.51         | 0.00        | 80.32         |               | 115.46          |              |  |
| 42.00                                                                                                            | Flour, self rising (Bisquick) | 101         | 70         | 100        | 30      | 14        | 10        | 168.00        | 3.15         | 6.30         | 26.25        | 0.00        | 1837.5        |               | 2625            |              |  |
| 40.00                                                                                                            | Bread, Pumpnickel, mean 6     | 84          | 50         | 71         | 30      | 12        | 6         | 100.00        | 3.48         | 1.24         | 19.00        | 2.60        | 950           |               | 1349            |              |  |
| 80.00                                                                                                            | Cheese, cheddar (RF)          | None        | NV         | NV         | NV      | NV        | NV        | 257.14        | 20.00        | 17.14        | 2.86         | 0.00        | 0             |               | 0               |              |  |
| 23.50                                                                                                            | Barley, pearled, raw          | 256         | 25         | 36         | 150     | 42        | 11        | 82.72         | 2.33         | 0.27         | 18.26        | 3.67        | 456.5         |               | 657.36          |              |  |
| 30.00                                                                                                            | Yogurt, plain                 | 381         | 24         | 34         | 200     | 14        | 3         | 16.73         | 1.72         | 0.05         | 2.30         | 0.00        | 55.2          |               | 78.2            |              |  |
| 9.00                                                                                                             | Butter, salted                | None        | NV         | NV         | NV      | NV        | NV        | 64.53         | 0.08         | 7.30         | 0.01         | 0.00        | 0             |               | 0               |              |  |
| 50.00                                                                                                            | Water                         | None        | NV         | NV         | NV      | NV        | NV        | 0.00          | 0.00         | 0.00         | 0.00         | 0.00        | 0             |               | 0               |              |  |
| 2.00                                                                                                             | Fructose                      | 580         | 19.2       | 27         | 10      | 10        | 2         | 9.23          | 0.00         | 0.00         | 2.46         | 0.00        | 47.232        |               | 66.42           |              |  |
| 40.00                                                                                                            | Egg white                     | None        | NV         | NV         | NV      | NV        | NV        | 20.00         | 4.21         | 0.00         | 0.41         | 0.00        | 0             |               | 0               |              |  |
| 0.70                                                                                                             | Cellulose, Food Grade         | None        | NV         | NV         | NV      | NV        | NV        | 0.00          | 0.00         | 0.00         | 0.00         | 0.70        | 0             |               | 0               |              |  |
| <b>Meal Totals</b>                                                                                               |                               |             | <b>201</b> | <b>287</b> |         | <b>95</b> | <b>34</b> | <b>736.78</b> | <b>36.75</b> | <b>32.43</b> | <b>74.06</b> | <b>6.97</b> | <b>46.27</b>  | <b>34.268</b> | <b>66.04699</b> | <b>48.91</b> |  |
| Gram Wt                                                                                                          | Sweet Potato Bake             | Food Number | GI Glucose | GI Bread   | Ref Svc | Avail CHO | GL        | Kcals         | Protein      | Fat          | CHO          | Fiber       | GI Glucose    | GL Glucose    | GI              | GL           |  |
| 60.00                                                                                                            | Cheese, mozzarella, part skim | None        | NV         | NV         | NV      | NV        | NV        | 152.55        | 14.56        | 9.55         | 1.66         | 0.00        | 0             |               | 0               |              |  |
| 100.00                                                                                                           | Chicken Broth, Home Taste     | None        | NV         | NV         | NV      | NV        | NV        | 16.00         | 2.02         | 0.57         | 0.38         | 0.00        | 0             |               | 0               |              |  |
| 20.00                                                                                                            | Flour, All Purpose            | 101         | 70         | 100        | 20      | 14        | 10        | 72.80         | 2.07         | 0.02         | 15.26        | 0.54        | 1068.2        |               | 1526            |              |  |
| 60.00                                                                                                            | Milk, whole, mean 5 studies   | 369         | 27         | 38         | 250     | 12        | 3         | 36.00         | 1.93         | 1.95         | 2.71         | 0.00        | 73.17         |               | 102.98          |              |  |
| 140.00                                                                                                           | Sweet Potato, cooked          | 613         | 44         | 63         | 150     | 25        | 11        | 162.40        | 2.09         | 0.20         | 38.61        | 5.46        | 1698.8        |               | 2432.43         |              |  |
| 70.00                                                                                                            | Ham, diced, smoked            | None        | NV         | NV         | NV      | NV        | NV        | 75.00         | 11.25        | 2.50         | 1.25         | 0.00        | 0             |               | 0               |              |  |
| 28.00                                                                                                            | Bread, Pumpnickel, mean 6     | 84          | 50         | 71         | 30      | 12        | 6         | 70.00         | 2.44         | 0.87         | 13.30        | 1.82        | 665           |               | 944.3           |              |  |
| 10.00                                                                                                            | Onion, frozen                 | None        | NV         | 0          | NV      | NV        | NV        | 2.90          | 0.08         | 0.01         | 0.68         | 0.18        | 0             |               | 0               |              |  |
| 16.50                                                                                                            | Oil, olive                    | None        | NV         | NV         | NV      | NV        | NV        | 145.86        | 0.00         | 16.50        | 0.00         | 0.00        | 0             |               | 0               |              |  |
| <b>Meal Totals</b>                                                                                               |                               |             | <b>191</b> | <b>272</b> |         | <b>63</b> | <b>30</b> | <b>733.51</b> | <b>36.44</b> | <b>32.17</b> | <b>73.85</b> | <b>8.00</b> | <b>47.464</b> | <b>35.052</b> | <b>67.78213</b> | <b>50.06</b> |  |

SUPPLEMENTARY DATA

**Supplementary Table 5.** Baseline characteristics of study participants (n=26)

| Variable                 | Mean ± SD    |
|--------------------------|--------------|
| Height (cm)              | 169.0 ± 8.7  |
| Weight (kg)              | 83.4 ± 11.7  |
| BMI (kg/m <sup>2</sup> ) | 29.1 ± 2.8   |
| Systolic BP (mm Hg)      | 115.5 ± 10.8 |
| Diastolic BP (mm Hg)     | 76.5 ± 9.0   |
| Age (yrs)                | 43.5 ± 14.7  |
| Fasting glucose (mg/dL)  | 90.9 ± 10.9  |

**Supplementary Figure 1.** High glycemic index, high carbohydrate menu.

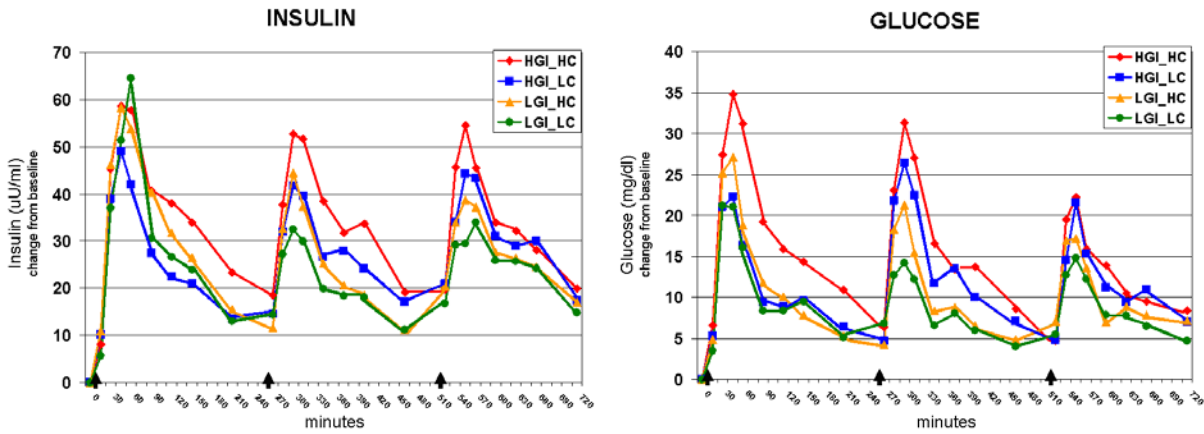

Supplement: supp_dc12-0329v120329_DC120329SupplementaryData.pdf [file supp_dc12-0329v120329_DC120329SupplementaryData.pdf]
